# Supplementary material for: Assessment of Probable Opioid Use Disorder Using Electronic Health Record Documentation
Source: PubMed Central journal article supplement (PMC7489858; doi:10.1001/jamanetworkopen.2020.15909), 2020-09-04
Supplement: jamanetwopen-e2015909-s001.pdf [file jamanetwopen-e2015909-s001.pdf]

## Supplementary Online Content

Palumbo SA, Adamson KM, Krishnamurthy S, et al. Assessment of probable opioid use disorder using electronic health record documentation. *JAMA Netw Open*. 2020;3(9):e2015909. doi:10.1001/jamanetworkopen.2020.15909

**eAppendix.** Supplemental Methods

**eTable 1.** ICD 9/10 Codes Used for Each Phenotype

**eTable 2.** Demographic and Health Record Summary Data for GMMP-M and GMMP-V Subgroups

**eTable 3.** EHR Search Categories and Number of Patients With Each Category

**eTable 4.** Specific Toxicology Screen Violations by Subtype

**eTable 5.** Frequency of Positive Search Criteria

This supplementary material has been provided by the authors to give readers additional information about their work.

## **eAppendix.** Supplemental Methods

### **eMethods 1: Agreement terms of the Patient Drug Monitoring Program contracts.**

Patients that sign this contract agree to the following terms:

- (1) To attend regularly scheduled appointments.
- (2) To take medication only as prescribed.
- (3) To agree to one provider and fills at one specified pharmacy.
- (4) To pick up own prescription at pharmacy or by authorized persons (named in agreement).
- (5) To not to obtain other controlled substances, including opioid pain medicines, controlled stimulants or anti-anxiety medicines from any other provider.
- (6) To not borrow or accept medication from friends, use street or illegal drugs, and/or sell/give medication to another person.
- (7) To not make any attempt to forge or alter any prescriptions.
- (8) To safeguard medications to prevent lost or theft.
- (9) To submit to random drug screens and pill counts.

Patients who violate the terms of this agreement are denoted with a separate EPIC code.

Examples of violations of the above are as follows:

- (1) Cancellation or no show for two or more appointments (considered a cancellation if less than one working days' notice).
- (2) Increasing or decreasing dose without discussing with provider.
- (3) Seeking and/or filling prescription(s) from another provider or multiple pharmacies.
- (4) Allowing someone other than self or authorized person to pick up prescription.
- (5) Obtaining other controlled substances, including those legally prescribed by other physicians and/or illegal acquisition of prescription or street drugs.
- (6) To forge or alter prescriptions.
- (7) Repeated reports of lost or stolen medication.
- (8) Refusal to submit to urine toxicology screen and/or pill counts.
- (9) Positive urine toxicology screen for substances not prescribed.

### **eMethods 2: Opioid drugs included and equivalent dose determination:**

All opioid prescription records were also drawn from the EHR, and morphine milligram equivalent (MME) dose was calculated using the global rPH calculator (<http://www.globalrph.com/narcotic.cgi>). Opioid drugs included were hydromorphone, methadone, oxycodone, morphine sulfate, hydrocodone, tapentadol, tramadol, codeine, and fentanyl.

### **eMethods 3: Chart Review Variables:**

(A) Demographic and health record information relevant to the GMMP program for each group, included:

- (A1) Length of Electronic Health Record (EHR),  
The duration of the patient's health record was quantified in number of days. This was determined by calculating the number of days between the patient's very first encounter with the health system and the most recent visit, as of May 31, 2018.
- (A2) Current opioid prescription with Morphine Milligram Equivalence (MME),

Current opiate prescription and dosage, and other controlled substances were recorded. Morphine milligram equivalence (MME) was calculated based on current prescription. Current prescriptions are located under the medications tabs. To identify current opioid prescriptions, the medication list was filtered by pharmaceutical class to only show analgesic narcotics. This same process was conducted to identify current controlled substance. To do so, the medication list was filtered by class and then by class II, III, and IV. MME was calculated using standard conversion procedure.

- (A3) Number of Emergency Room (ER) visits over the course of the patient's record:  
Emergency rooms visits were searched and number summed from the beginning of the patient's health record until their most recent visit.
  
- (B) Criteria related to an OUD DSM diagnosis:
- (B1) Vocational interference due to drug use or pain  
A positive vocational interference may indicate that the patient is unable to work due to pain, or that their prescription opioid use is impacting their work. Health records were searched for terms that indicated if a patient's occupation was impacted by their use of opioids or pain. Terms that were searched included: occupation, work, job, boss, manager, too much pain, can't work.
- (B2) Patient Disability Status  
Health records, including notes and encounters were searched for terms that indicated whether the patient was disabled. A positive disability status may indicate that the patient's pain was so great that it interfered with their occupation. If it was mentioned that a patient was planning to file for disability or was waiting to hear if they were approved, they were categorized as a no. Terms that were searched included: disability, too much pain, unemployment, can't work, paperwork.  
-Yes- disability indicated in the EHR  
-No- Explicitly states the patient is not disabled  
-No Record- No mention of ability status
- (B3) Whether weaning was described as unsuccessful or difficult  
If it was indicated that the patient had been weaned off an opioid, a further search was conducted to determine if the weaning was difficult or had complications.  
-Yes- the record indicates that weaning was difficult or unsuccessful for the individual  
-No- weaning was mentioned for the individual but was successful and/or not difficult and complicated  
-No record- weaning was mentioned though the success and difficulty of the action was not recorded  
- N/A- weaning was not mentioned for this individual thus cannot be difficult or unsuccessful
- (B4) Positive toxicology screen for opioids other than prescribed  
In order to verify that the patient was following the conditions of the GMMP agreement, health records were searched for urine toxicology screens to ensure that medications that the patient was prescribed were present in their urine and non-prescribed medications were not present. Number of toxicology screens varied between patients ranging from no toxicology screens to 50+. Toxicology screens were identified under the lab tests section. Because there are several tests, a filter was used to identify toxicology screens. Tests that were searched were: toxicology screens, urine toxicology screens, and opiates

confirmatory. The only toxicology screens that were reviewed were those that were collected during the GMMP agreement period. After the toxicology screen result was identified, prescribed medications at the time of the collection were verified. To do so, the medication list was opened and filtered by pharmaceutical class then by analgesics-narcotics. The date of the toxicology screen was identified and then matched to the closest date of prescription. The same process was conducted for controlled substances. The date of the toxicology screen was also identified if a medication was not present in the system in order to review the medications that we prescribed at that time.

- (B5) Lost pills mentioned  
Several scenarios consistently occurred in the chart review where patients reported missing pills such as having them stolen, misplaced, lost, or ruined due to accidents such as dropping them in water. Terms that were searched included: lost, missing, stolen, misplace, robbed, police report, and gone.  
-Yes- the record mentions lost pills  
-No- there was no mention of lost pills
- (B6) Multiple Opioid Prescribers Mentioned  
To search if a patient was receiving more than one opioid prescription, the medication list was searched for more than one providers or prescription during the same time period. If a patient received an opioid prescription from the emergency room while actively being prescribed an opioid, that was identified as multiple prescribers. If it was not evident in the medication list that the patient was receiving multiple prescriptions, terms were searched in the notes to identify if a prescriber identified that the patient was receiving more than one prescription or going to the more than one pharmacy. Terms that were searched included: multiple, various, pharmacy, and prescribers.  
-Yes- Multiple opioid prescribers were mentioned in the record  
-No- Multiple opioid prescribers were not mentioned in the record
- (B7) Multiple Pharmacies Mentioned  
To search if a patient was receiving more than one opioid prescription, the medication list was searched for more than one provider or prescription during the same time period. If a patient received an opioid prescription from the emergency room while actively being prescribed an opioid, that was identified as multiple prescribers. If it was not evident in the medication list that the patient was receiving multiple prescriptions, terms were searched in the notes to identify if a prescriber identified that the patient was receiving more than one prescription or going to the more than one pharmacy. Terms that were searched included: multiple, various, pharmacy, and prescribers.  
-Yes- Multiple Pharmacies were mentioned  
-No- Multiple Pharmacies were not mentioned
- (B8) Early Prescription Refills Mentioned  
Was it ever mentioned in the patient's health record if the patient requested an early medication refill? Terms that were searched included: refill, too soon, early, and ran out.  
-Yes- Early refills were mentioned  
-No- Early refills were not mentioned
- (B9) Opioid overdose mentioned  
Terms that were searched included: overdose, intoxicated, unconscious, and intravenous.  
-Yes- Opioid overdose was mentioned  
-No- Opioid overdose was not mentioned

- (B10) Substance abuse mentioned
 

The patient was classified as “yes” for substance if illicit drugs that were not separately screened for (i.e. alcohol, marijuana, tobacco), were in the health record. Terms that were searched included: abuse, substance abuse, heroin, street drugs, detox, selling, dealing, and high.

  - Yes- substance abuse was mentioned
  - No- substance abuse was not mentioned
- (B11) Hazardous situation as a result of opioid mentioned
 

An instance was considered to be hazardous if there was a suicide attempts via overdose, selling prescription, or ingesting prescription in conjunction with illicit drugs such as cocaine.

  - Yes- such a situation was noted in the record
  - No- a hazardous situation due to the opioid was not mentioned
- (B12) Interpersonal or legal issues as a result of opioid mentioned
 

An instance was considered to be an interpersonal or legal issue if the police were involved in any capacity, if lawyers were mentioned, if jail or prison occurred, or if children services were mentioned.

  - Yes- issues were mentioned
  - No- issues were not mentioned
- (B13) Medical issues as a result of opioid mentioned
 

Medical issues that were considered included narcotic abuse or dependence, withdrawal symptoms, constipation secondary to opioid use, or diseases contracted through drug use such as hepatitis C.

  - Yes- medical issues due to the opioid were mentioned
  - No- medical issues due to the opioid were not mentioned
- (B14) Craving mentioned
 

Was it ever mentioned in the health record if the patient exhibited craving? The health record was first searched for the SOAPP-R (Screener and Opioid Assessment for Patients with Pain-Revised) which provides a risk score for opioid abuse. A patient was considered to exhibit craving symptoms if it was mentioned in their record that they were experiencing withdrawal symptoms or if it was specifically mentioned that they were craving the drug.

  - Yes- craving was mentioned
  - No- craving was not mentioned
- (B15) Provider mentioned drug-seeking behavior
 

Was it ever mentioned in the health record if the patient exhibited drug-seeking behavior? The health record was first searched for the SOAPP-R (Screener and Opioid Assessment for Patients with Pain-Revised) which provides a risk score for opioid abuse. A patient was considered to exhibit drug-seeking behavior if it was mentioned in the physician’s notes as so. Terms that were searched from drug-seeking behavior included: seeking, narcotic seeking, and drug seeking.

  - Yes- drug-seeking behavior was mentioned
  - No- drug-seeking behavior was not mentioned

**eTable 1.** ICD 9/10 Codes Used for Each Phenotype

| <b>ICD 9</b>      | <b>ICD 10</b> | <b>Diagnosis</b>                                                               |
|-------------------|---------------|--------------------------------------------------------------------------------|
| <b>Anxiety</b>    |               |                                                                                |
| 300               | F41.9         | Anxiety disorder, unspecified                                                  |
| 300.01            | F41.0         | Panic disorder [episodic paroxysmal anxiety] without agoraphobia               |
| 300.02            | F41.1         | Generalized anxiety disorder                                                   |
| 300.09            | F41.3         | Other mixed anxiety disorders                                                  |
| 300.09            | F41.8         | Other specified anxiety disorders                                              |
| <b>Depression</b> |               |                                                                                |
| 296.3             | F33.40        | Major depressive disorder, recurrent, in remission, unspecified                |
| 296.3             | F33.9         | Major depressive disorder, recurrent, unspecified                              |
| 296.31            | F33.0         | Major depressive disorder, recurrent, mild                                     |
| 296.32            | F33.1         | Major depressive disorder, recurrent, moderate                                 |
| 296.33            | F33.2         | Major depressive disorder, recurrent severe without psychotic features         |
| 296.34 or 298.0   | F33.3         | Major depressive disorder, recurrent, severe with psychotic symptoms           |
| 296.35            | F33.41        | Major depressive disorder, recurrent, in partial remission                     |
| 296.36            | F33.42        | Major depressive disorder, recurrent, in full remission                        |
| 296.99            | F33.8         | Other recurrent depressive disorders                                           |
| 311               | F32.9         | Depressive disorder, not elsewhere classified                                  |
| <b>Alcohol</b>    |               |                                                                                |
| 291               | F10.121       | Alcohol abuse with intoxication delirium                                       |
| 291               | F10.231       | Alcohol dependence with withdrawal delirium                                    |
| 291.3             | F10.251       | Alcohol dependence with alcohol-induced psychotic disorder with hallucinations |
| 291.4             | F10.929       | Alcohol use, unspecified with intoxication, unspecified                        |
| 291.81            | F10.230       | Alcohol dependence with withdrawal, uncomplicated                              |
| 291.81            | F10.239       | Alcohol dependence with withdrawal, unspecified                                |
| 291.89            | F10.159       | Alcohol abuse with alcohol-induced psychotic disorder, unspecified             |
| 291.89            | F10.288       | Alcohol dependence with other alcohol-induced disorder                         |
| 291.9             | F10.19        | Alcohol abuse with unspecified alcohol-induced disorder                        |
| 291.9             | F10.29        | Alcohol dependence with unspecified alcohol-induced disorder                   |
| 291.9             | F10.99        | Alcohol use, unspecified with unspecified alcohol-induced disorder             |
| 303               | F10.229       | Acute alcoholic intoxication in alcoholism, unspecified                        |
| 303.01            | F10.229       | Acute alcoholic intoxication in alcoholism, continuous                         |
| 303.9             | F10.20        | Other and unspecified alcohol dependence                                       |
| 303.9             | F10.20        | Other and unspecified alcohol dependence, unspecified                          |
| 303.9             | F10.20        | Alcohol dependence, uncomplicated                                              |
| 303.91            | F10.20        | Other and unspecified alcohol dependence, continuous                           |

|                                      |         |                                                                                   |
|--------------------------------------|---------|-----------------------------------------------------------------------------------|
| 303.92                               | F10.20  | Other and unspecified alcohol dependence, episodic                                |
| 303.93                               | F10.21  | Other and unspecified alcohol dependence, in remission                            |
| 303.93                               | F10.21  | Alcohol dependence, in remission                                                  |
| 305                                  | F10.10  | Alcohol abuse, unspecified                                                        |
| 305.01                               | F10.10  | Alcohol abuse, continuous                                                         |
| 305.02                               | F10.10  | Alcohol abuse, episodic                                                           |
| 305.03                               | F10.11  | Alcohol abuse, in remission                                                       |
| 303 or 303.01                        | F10.229 | Alcohol dependence with intoxication, unspecified                                 |
| 303.00 or 303.01 or 303.02 or 303.03 | F10.220 | Alcohol dependence with intoxication, uncomplicated                               |
| 305 or 305.01 or 305.02              | F10.10  | Alcohol abuse, uncomplicated                                                      |
| 305.00 or 305.01 or 305.02           | F10.120 | Alcohol abuse with intoxication, uncomplicated                                    |
| 305.00 or 305.01 or 305.02           | F10.129 | Alcohol abuse with intoxication, unspecified                                      |
| <b>Nicotine</b>                      |         |                                                                                   |
| 292.89                               | F17.218 | Nicotine dependence, cigarettes, with other nicotine-induced disorders            |
| 292.89                               | F17.228 | Nicotine dependence, chewing tobacco, with other nicotine-induced disorders       |
| 292.9                                | F17.209 | Nicotine dependence, unspecified, with unspecified nicotine-induced disorders     |
| 292.9                                | F17.219 | Nicotine dependence, cigarettes, with unspecified nicotine-induced disorders      |
| 292.9                                | F17.229 | Nicotine dependence, chewing tobacco, with unspecified nicotine-induced disorders |
| 305.1                                | F17.200 | Tobacco use disorder                                                              |
| 305.1                                | F17.200 | Nicotine dependence, unspecified, uncomplicated                                   |
| 305.1                                | F17.201 | Nicotine dependence, unspecified, in remission                                    |
| 305.1                                | F17.210 | Nicotine dependence, cigarettes, uncomplicated                                    |
| 305.1                                | F17.220 | Nicotine dependence, chewing tobacco, uncomplicated                               |
| 305.1                                | F17.290 | Nicotine dependence, other tobacco product, uncomplicated                         |
| *                                    | F17.21  | Nicotine dependence, cigarettes                                                   |
| <b>Opioid</b>                        |         |                                                                                   |
| 304.7                                | *       | Combinations of opioid type drug with any other drug dependence, unspecified      |
| 304.71                               | *       | Combinations of opioid type drug with any other drug dependence, continuous       |
| 304.73                               | *       | Combinations of opioid type drug with any other drug dependence, in remission     |
| 304.8                                | *       | Combinations of drug dependence excluding opioid type drug, unspecified           |
| 304.81                               | *       | Combinations of drug dependence excluding opioid type drug, continuous            |
| 304.82                               | *       | Combinations of drug dependence excluding opioid type drug, episodic              |

|                              |         |                                                                                                                          |
|------------------------------|---------|--------------------------------------------------------------------------------------------------------------------------|
| 304.83                       | *       | Combinations of drug dependence excluding opioid type drug, in remission                                                 |
| 305.5                        | F11.10  | Opioid abuse, unspecified                                                                                                |
| 305.51                       | F11.10  | Opioid abuse, continuous                                                                                                 |
| 305.52                       | F11.10  | Opioid abuse, episodic                                                                                                   |
| 305.53                       | F11.11  | Opioid abuse, in remission                                                                                               |
| <b>Other Substance Abuse</b> |         |                                                                                                                          |
| 292                          | F15.93  | Other stimulant use, unspecified with withdrawal                                                                         |
| 292                          | F19.930 | Other psychoactive substance use, unspecified with withdrawal, uncomplicated                                             |
| 292                          | F19.939 | Other psychoactive substance use, unspecified with withdrawal, unspecified                                               |
| 292.11                       | F19.950 | Other psychoactive substance use, unspecified with psychoactive substance-induced psychotic disorder with delusions      |
| 292.12                       | F19.951 | Other psychoactive substance use, unspecified with psychoactive substance-induced psychotic disorder with hallucinations |
| 292.2                        | F12.120 | Cannabis abuse with intoxication, uncomplicated                                                                          |
| 292.2                        | F15.920 | Other stimulant use, unspecified with intoxication, uncomplicated                                                        |
| 292.84                       | F19.94  | Other psychoactive substance use, unspecified with psychoactive substance-induced mood disorder                          |
| 292.85                       | F19.982 | Other psychoactive substance use, unspecified with psychoactive substance-induced sleep disorder                         |
| 292.89                       | F15.959 | Other stimulant use, unspecified with stimulant-induced psychotic disorder, unspecified                                  |
| 292.89                       | F19.959 | Other psychoactive substance use, unspecified with psychoactive substance-induced psychotic disorder, unspecified        |
| 292.9                        | F12.19  | Cannabis abuse with unspecified cannabis-induced disorder                                                                |
| 292.9                        | F19.99  | Other psychoactive substance use, unspecified with unspecified psychoactive substance-induced disorder                   |
| 304.1                        | F13.20  | Sedative, hypnotic or anxiolytic dependence, unspecified                                                                 |
| 304.11                       | F13.20  | Sedative, hypnotic or anxiolytic dependence, continuous                                                                  |
| 304.13                       | F13.21  | Sedative, hypnotic or anxiolytic dependence, in remission                                                                |
| 304.13                       | F13.21  | Sedative, hypnotic or anxiolytic dependence, in remission                                                                |
| 304.2                        | F14.20  | Cocaine dependence, unspecified                                                                                          |
| 304.2                        | F14.20  | Cocaine dependence, uncomplicated                                                                                        |
| 304.23                       | F14.21  | Cocaine dependence, in remission                                                                                         |
| 304.23                       | F14.21  | Cocaine dependence, in remission                                                                                         |
| 304.3                        | F12.20  | Cannabis dependence, unspecified                                                                                         |
| 304.31                       | F12.20  | Cannabis dependence, continuous                                                                                          |
| 304.33                       | F12.21  | Cannabis dependence, in remission                                                                                        |
| 304.4                        | F15.20  | Amphetamine and other psychostimulant dependence, unspecified                                                            |



|                 |                  |                                                                          |
|-----------------|------------------|--------------------------------------------------------------------------|
| 304.41          | F15.20           | Amphetamine and other psychostimulant dependence, continuous             |
| 304.43          | F15.21           | Amphetamine and other psychostimulant dependence, in remission           |
| 304.6           | F19.20           | Other specified drug dependence, unspecified                             |
| 304.61          | F19.20           | Other specified drug dependence, continuous                              |
| 304.63          | F19.21           | Other specified drug dependence, in remission                            |
| 304.63          | F19.21           | Other psychoactive substance dependence, in remission                    |
| 304.9           | *                | Unspecified drug dependence, unspecified                                 |
| 304.91          | *                | Unspecified drug dependence, continuous                                  |
| 304.92          | *                | Unspecified drug dependence, episodic                                    |
| 304.93          | *                | Unspecified drug dependence, in remission                                |
| 305.2           | F12.10           | Cannabis abuse, unspecified                                              |
| 305.21          | F12.10 or F12.90 | Cannabis abuse, continuous                                               |
| 305.22          | F12.10 or F12.90 | Cannabis abuse, episodic                                                 |
| 305.23          | F12.11           | Cannabis abuse, in remission                                             |
| 305.33          | F16.11           | Hallucinogen abuse, in remission                                         |
| 305.4           | F13.10           | Sedative, hypnotic or anxiolytic abuse, unspecified                      |
| 305.41          | F13.10           | Sedative, hypnotic or anxiolytic abuse, continuous                       |
| 305.42          | F13.10           | Sedative, hypnotic or anxiolytic abuse, episodic                         |
| 305.6           | F14.10           | Cocaine abuse, unspecified                                               |
| 305.61          | F14.10           | Cocaine abuse, continuous                                                |
| 305.63          | F14.11           | Cocaine abuse, in remission                                              |
| 305.7           | F15.10           | Amphetamine or related acting sympathomimetic abuse, unspecified         |
| 305.7           | F15.10           | Other stimulant abuse, uncomplicated                                     |
| 305.73          | F15.11           | Amphetamine or related acting sympathomimetic abuse, in remission        |
| 305.8           | F19.10           | Antidepressant type abuse, unspecified                                   |
| 305.8           | F19.10           | Other psychoactive substance abuse, uncomplicated                        |
| 305.8           | F19.90           | Other psychoactive substance use, unspecified, uncomplicated             |
| 305.9           | F19.10 or F18.10 | Other, mixed, or unspecified drug abuse, unspecified                     |
| 305.91          | F19.10 or F18.10 | Other, mixed, or unspecified drug abuse, continuous                      |
| 305.92          | F19.10 or F18.10 | Other, mixed, or unspecified drug abuse, episodic                        |
| 305.93          | F19.11 or F18.11 | Other, mixed, or unspecified drug abuse, in remission                    |
| 292.0 or 304.10 | F13.239          | Sedative, hypnotic or anxiolytic dependence with withdrawal, unspecified |
| 292.0 or 304.60 | F19.230          | Other psychoactive substance dependence with withdrawal, uncomplicated   |

|                           |        |                                                            |
|---------------------------|--------|------------------------------------------------------------|
| 304.1 or 304.11           | F13.20 | Sedative, hypnotic or anxiolytic dependence, uncomplicated |
| 304.3 or 304.31           | F12.20 | Cannabis dependence, uncomplicated                         |
| 304.4 or 304.41           | F15.20 | Other stimulant dependence, uncomplicated                  |
| 304.6 or 304.61           | F19.20 | Other psychoactive substance dependence, uncomplicated     |
| 305.2 or 305.21 or 305.22 | F12.10 | Cannabis abuse, uncomplicated                              |
| 305.21 or 305.2 or 305.22 | F12.90 | Cannabis use, unspecified, uncomplicated                   |
| 305.4 or 305.41 or 305.42 | F13.10 | Sedative, hypnotic or anxiolytic abuse, uncomplicated      |
| 305.6 or 305.51 or 305.62 | F14.10 | Cocaine abuse, uncomplicated                               |

| <b>eTable 2. Demographic and Health Record Summary Data for GMMP-M and GMMP-V Subgroups</b> |                             |                           |                    |  |                           |                        |                  |
|---------------------------------------------------------------------------------------------|-----------------------------|---------------------------|--------------------|--|---------------------------|------------------------|------------------|
|                                                                                             | <b>GMMP-M<br/>N= 14,866</b> | <b>GMMP-V<br/>N=1,387</b> | <b>P<br/>Value</b> |  | <b>Test<br/>Statistic</b> | <b>Effect<br/>Size</b> | <b>95% CI</b>    |
| <b>Sample<br/>Demographics</b>                                                              |                             |                           |                    |  |                           |                        |                  |
| <b>Male</b>                                                                                 | 6,327                       | 620                       | 0.10               |  | 1.64                      | 0.02                   | (0.0045, 0.0494) |
| <b>Female</b>                                                                               | 8,539                       | 767                       |                    |  |                           |                        |                  |
| <b>Age</b>                                                                                  | 52.3                        | 47.2                      | <0.001             |  | 15.60                     | 5.15                   | (4.504, 5.799)   |
| <b>BMI</b>                                                                                  | 31.8                        | 30.5                      | <0.001             |  | 5.75                      | 1.27                   | (0.8374, 1.7040) |
| <b>Health Record<br/>Data</b>                                                               |                             |                           |                    |  |                           |                        |                  |
| <b>EHR length in<br/>days</b>                                                               | 4231                        | 4004                      | <0.001             |  | 4.28                      | 226                    | (122.8, 330.6)   |
| <b>ER visits</b>                                                                            | 8.3                         | 11.1                      | <0.001             |  | -4.34                     | 2.77                   | (1.518, 4.022)   |
| <b>Daily MME</b>                                                                            | 52.0                        | 48.8                      | 0.01               |  | 2.44                      | 3.20                   | (0.6336, 5.776)  |
| <b>Psychiatric<br/>Codes</b>                                                                |                             |                           |                    |  |                           |                        |                  |
| <b>Depression</b>                                                                           | 4902                        | 591                       | <0.001             |  | 35.86                     | 0.08                   | (0.0513, 0.1048) |
| <b>Anxiety</b>                                                                              | 5896                        | 702                       | <0.001             |  | 42.09                     | 0.09                   | (0.0606, 0.1150) |
| <b>Addiction Codes</b>                                                                      |                             |                           |                    |  |                           |                        |                  |
| <b>Alcohol</b>                                                                              | 424                         | 74                        | <0.001             |  | 21.97                     | 0.02                   | (0.0105, 0.0345) |
| <b>Nicotine</b>                                                                             | 4178                        | 622                       | <0.001             |  | 139                       | 0.15                   | (0.1211, 0.1747) |
| <b>Opioids</b>                                                                              | 243                         | 51                        | <0.001             |  | 25.5                      | 0.02                   | (0.0087, 0.0288) |
| <b>Other Substance<br/>Abuse</b>                                                            | 451                         | 130                       | <0.001             |  | 134                       | 0.06                   | (0.0439, 0.0745) |

\*\*\*GMMP-M and GMMP-V groups were based on all available people with each designation and therefore do not represent matched groups.

**eTable 3.** EHR Search Categories and Number of Patients With Each Category

|                                                       | Patient Group |        |        |
|-------------------------------------------------------|---------------|--------|--------|
|                                                       | Controls      | GMMP-M | GMMP-V |
| Vocational Interference Due to Drug Use or Pain       | 16            | 21     | 7      |
| Disabled                                              | 34            | 58     | 44     |
| Weaning Described as Unsuccessful or Difficult        | 1             | 10     | 13     |
| Positive Tox Screen for Opioids other than Prescribed | 6*            | 7*     | 30*    |
| Lost Pills                                            | 3             | 23     | 31     |
| Multiple Opioid Prescribers                           | 11            | 11     | 47     |
| Multiple Pharmacies                                   | 2             | 6      | 10     |
| Early Prescription Refills                            | 9             | 52     | 64     |
| Opioid Overdose                                       | 4             | 7      | 6      |
| Substance Abuse                                       | 18            | 28     | 51     |
| Hazardous Situation as Result of Opioid               | 4             | 20     | 23     |
| Interpersonal or Legal Issues as Result of Opioid     | 4             | 19     | 14     |
| Medical Issues as Result of Opioid                    | 15            | 41     | 29     |
| Craving                                               | 0             | 2      | 4      |
| Provider Mentioned Drug-seeking Behavior              | 5             | 10     | 21     |

\*These numbers correspond to individuals that tested positive for an unprescribed opioid. Toxicology screens that are negative for a prescribed opioid and/or positive for unprescribed controlled substances are also considered violations. For complete breakdown of other toxicology screen violations, see eTable 4. Gray boxes indicate other categories that would violate the terms of the GMMP contract.

**eTable 4.** Specific Toxicology Screen Violations by Subtype

|                                                                | <b>Controls</b> | <b>GMMP-M</b> | <b>GMMP-V</b> |
|----------------------------------------------------------------|-----------------|---------------|---------------|
| <b>Positive for unprescribed opioid</b>                        | 6               | 7             | 30            |
| <b>Positive for unprescribed non-opioid</b>                    | 15              | 16            | 52            |
| <b>Negative for prescribed opioid</b>                          | 0               | 13            | 48            |
| <b>Non-compliance with urine tox screen</b>                    | 0               | 0             | 8             |
| <b><i>Positive for unprescribed medication*</i></b>            | 17              | 20            | 64            |
| <b><i>Negative for prescribed medication*</i></b>              | 0               | 17            | 51            |
| <b><i>Both (+) for unprescribed and (-) for prescribed</i></b> | 0               | 10            | 35            |

\*Patients sometimes tested positive for more than one substance, thus values for all patients that test positive for unprescribed opioids/non-opioids, for example, do not add up to total # in 'positive for unprescribed medication'.

**eTable 5.** Frequency of Positive Search Criteria

| # of Positive Categories | Patient Group |        |        |
|--------------------------|---------------|--------|--------|
|                          | Controls      | GMMP-M | GMMP-V |
| 0                        | 124           | 11     | 0      |
| 1                        | 50            | 18     | 13     |
| 2                        | 11            | 19     | 17     |
| 3                        | 6             | 18     | 22     |
| 4                        | 4             | 12     | 13     |
| 5                        | 4             | 2      | 13     |
| 6                        | 1             | 5      | 6      |
| 7                        | 0             | 9      | 6      |
| 8                        | 0             | 3      | 7      |
| 9                        | 0             | 1      | 1      |
| 10                       | 0             | 1      | 1      |
| 11                       | 0             | 1      | 1      |
| 12                       | 0             | 0      | 0      |
| 13                       | 0             | 0      | 0      |
| 14                       | 0             | 0      | 0      |
| 15                       | 0             | 0      | 0      |
